# Supplementary material for: A community-based healthcare package combining testing and prevention tools, including pre-exposure prophylaxis (PrEP), immediate HIV treatment, management of hepatitis B virus, and sexual and reproductive health (SRH), targeting female sex workers (FSWs) in Côte d’Ivoire: the ANRS 12381 PRINCESSE project
Source: PubMed Central journal article supplement (PMC8642977; doi:10.1186/s12889-021-12235-0), 2021-12-04
Supplement: 12889_2021_12235_MOESM1_ESM.pdf [file 12889_2021_12235_MOESM1_ESM.pdf]

Supplementary Electronic Material

Figure S1. HIV and HBV care algorithm for PRINCESSE participants

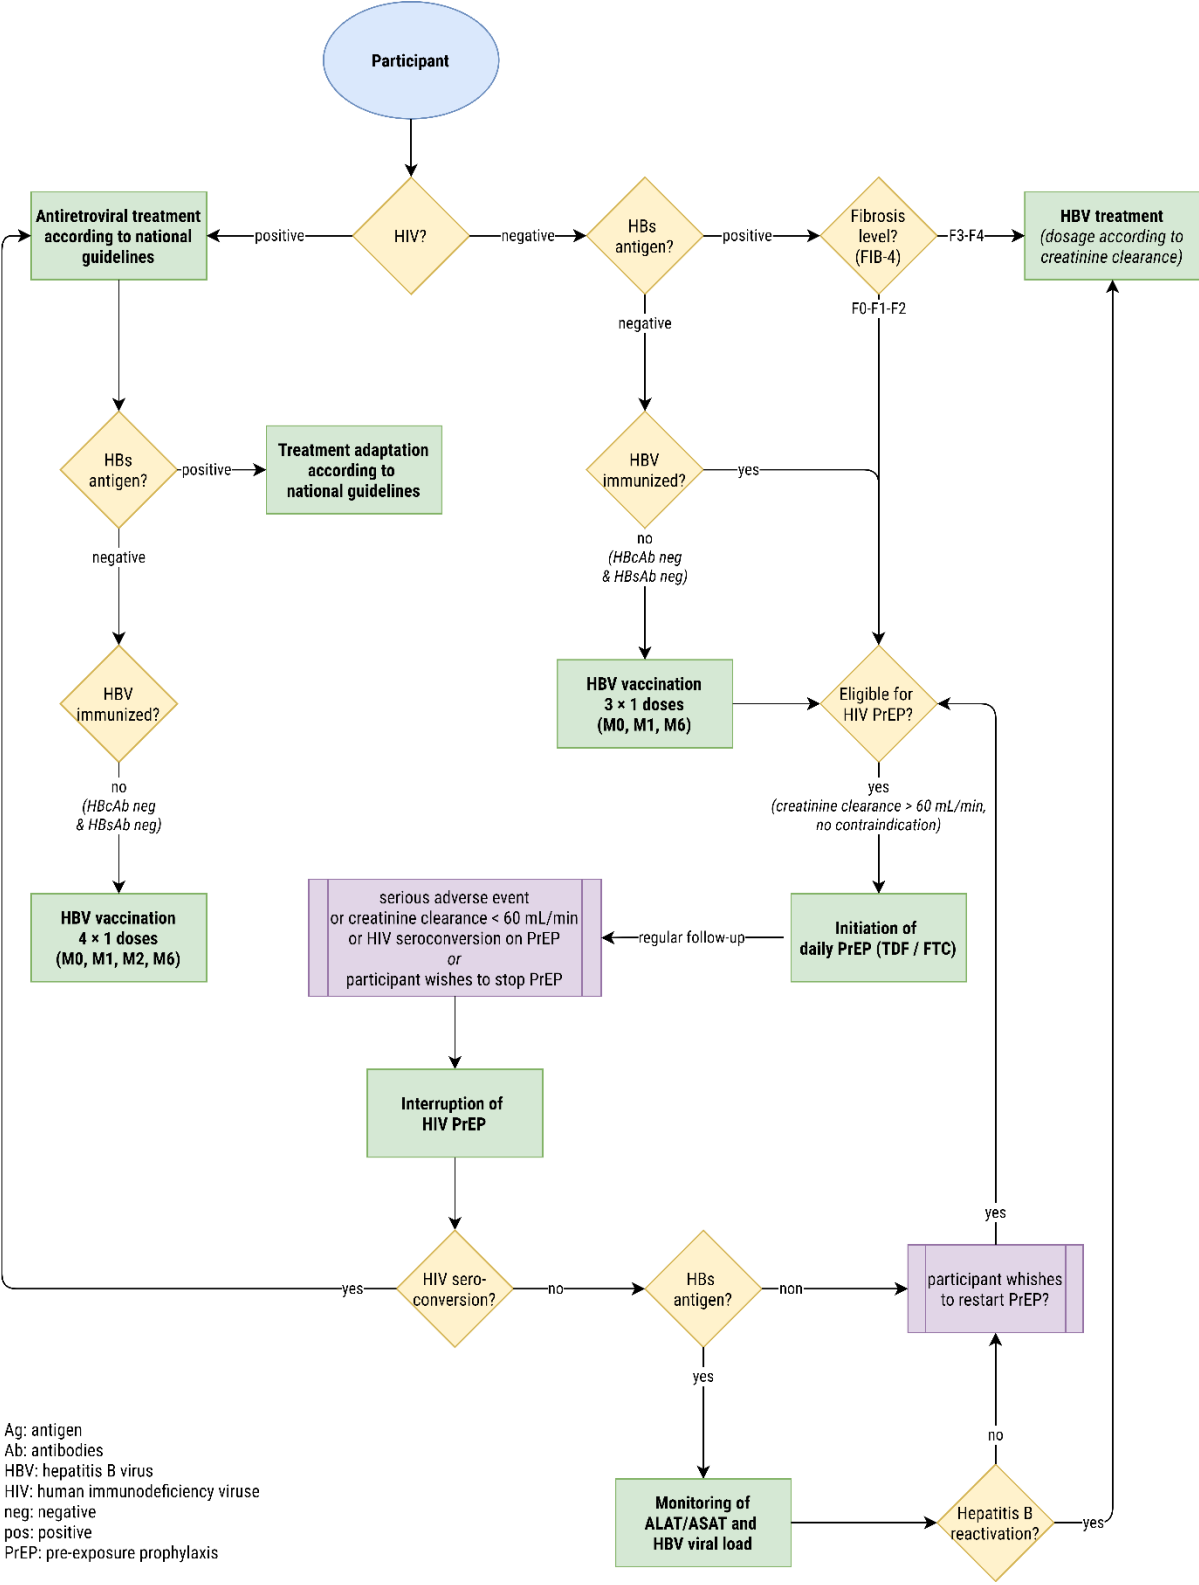

Ag: antigen  
 Ab: antibodies  
 HBV: hepatitis B virus  
 HIV: human immunodeficiency virus  
 neg: negative  
 pos: positive  
 PrEP: pre-exposure prophylaxis

## **S2. PRINCESSE Study group**

*Institutions and authors are sorted alphabetically.*

### **Investigators-Coordinators**

**PAC-CI, Côte d'Ivoire:** S Eholié

**Ceped, IRD, Université de Paris, Inserm, France:** J Larmarange

### **Implementation team**

**Aprosam, San Pedro, Côte d'Ivoire:** A Agoua (medical investigator), KP Anvo, S Akou, ML Brou, Cécé, Dodo, Flore, Francas, Kiki, P Kouassi, J Kouassi, Mama Kate, Merveille, Miss Falone, Nemy, Roky, Sly, C Zebago (medical investigator), GH Zonhoulou Dao (medical investigator)

**CEDRES, Abidjan, Côte d'Ivoire:** E Koné-Bravo

**PAC-CI, Abidjan, Côte d'Ivoire:** MN Nouaman (project coordinator)

### **Data management & monitoring**

**PAC-CI/MEREVA, Abidjan, Côte d'Ivoire:** MN Nouaman, A Kouamé, S Lenaud, C Yao

### **Study Team**

**Aprosam, San Pedro, Côte d'Ivoire:** A Agoua, C Zebago, GH Zonhoulou Dao

**Bordeaux Population Health Research Center, Université de Bordeaux, Inserm, IRD, France:** X Anglaret, M Plazy

**Ceped, IRD, Université de Paris, Inserm, France:** V Becquet, P Biligha, J Larmarange

**CES, Université Paris 1 Panthéon-Sorbonne, France:** C Pougue Biyong

**Espace Confiance, Abidjan, Côte d'Ivoire:** C Anoma

**Harvard University, Boston, US:** K Freedberg

**Hôpital Saint-Antoine, Paris, France:** A Boyd, K Lacombe

**Ined, Paris, France:** V Becquet

**IPLESP, Sorbonne Université, Inserm, Paris, France:** E Teyssou

**PAC-CI, Abidjan, Côte d'Ivoire:** X Anglaret, A Attia, P Coffie, C Danel, S Eholié, R Moh, MN Nouaman

**SESSTIM, Université Aix-Marseille, Inserm, IRD, Marseille, France:** M Fiorentino, B Spire

**Sorbonne Université, Hôpital Pitié-Salpêtrière, Paris, France:** V Calvez, A Jary, V Leducq, AG Marcelin

**Université de Bordeaux, GH Pellegrin, CHU de Bordeaux, France:** C Bébéar

**Université de Paris, AP-HP, GH Saint-Louis-Lariboisière-Fernand Widal, France:** B Berçot

### **Scientific Advisory Board**

K Lacombe (chair, Hôpital Saint-Antoine, Paris), I Ahiba Bobo (National AIDS Programme, Abidjan), E Allah Kouadio (National Viral Hepatitis Programme, Abidjan), N de Castro (Hôpital Saint-Louis, Paris), A Horo (PAC-CI, Abidjan), C Laurent (IRD, Montpellier), J Tetty (Bletty, Abidjan), B Vuylsteke (Institut de Médecine Tropicale, Anvers), M Zannou (Université d'Abomey-Calavi, Cotonou)

### **Study sponsor representatives**

**ANRS | MIE, Paris, France:** M Ben Mechlia, V Doré, N Mercier, A Montoyo, C Rekacewicz

### **Internship students**

**ISPED, Université de Bordeaux, France:** N Badirou, E Moreno
